# Supplementary material
Source: MDPI journal article supplement (https://www.mdpi.com/2077-1312/10/1/87)
Supplement: s1 [file s1]

Supplementary figures:

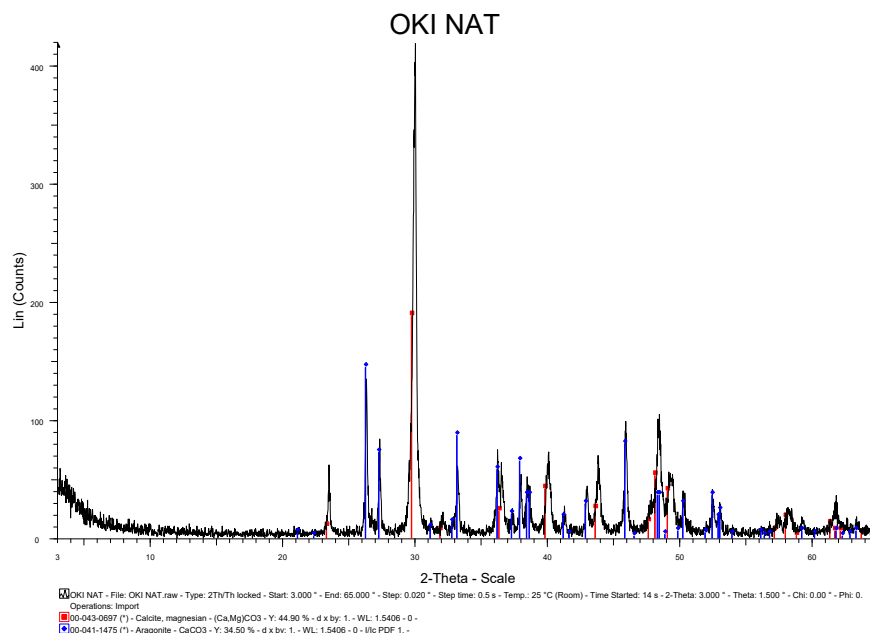

**Figure S1.** XRD analyses of beachrock sample from natural Okinawa beachrock, sample Sum2.

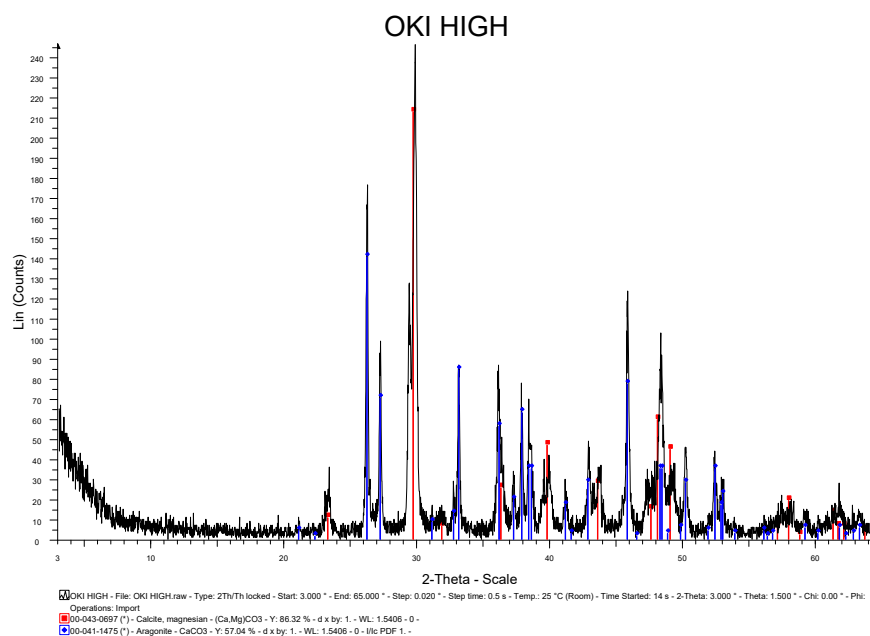

**Figure S2.** XRD analyses of artificial beachrock sample from Okinawa beachrock ArSum1.

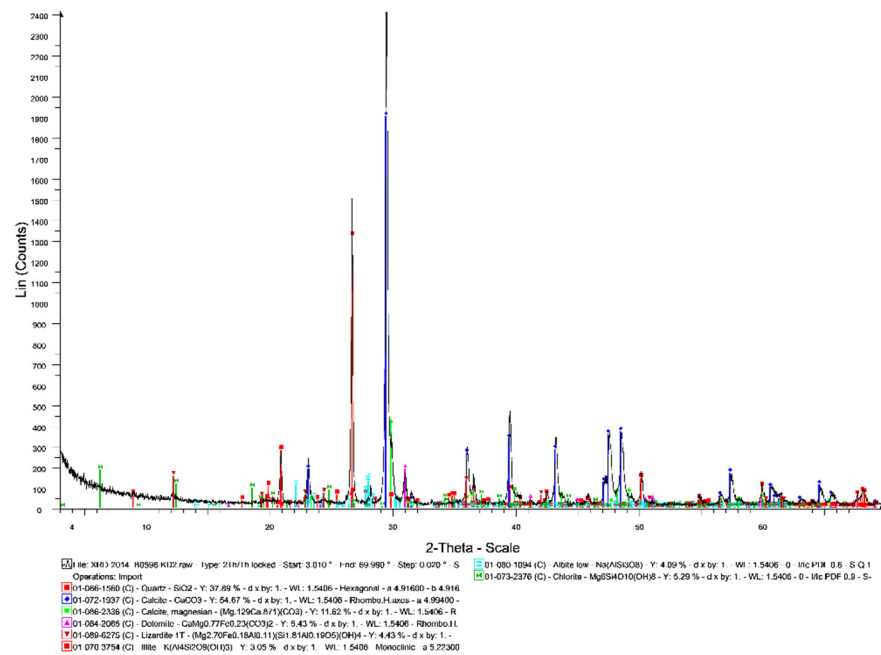

Figure S3. XRD analyses of beachrock sample from natural Diolkos beachrock Kodi2.

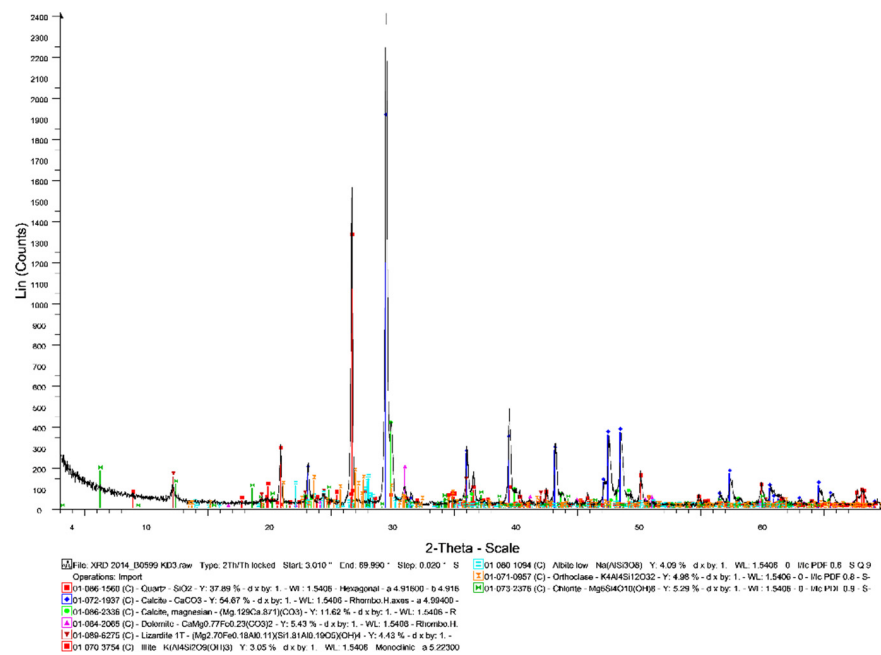

Figure S4. XRD analyses of beachrock sample from natural Diolkos beachrock Kodi3.

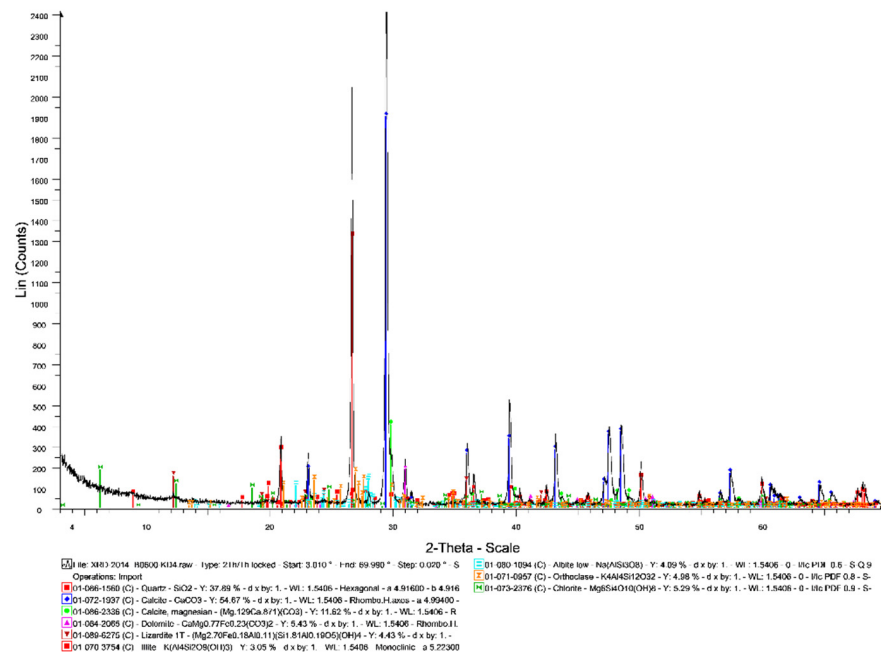

Figure S5. XRD analyses of beachrock sample from natural Diolkos beachrock Kodi4.

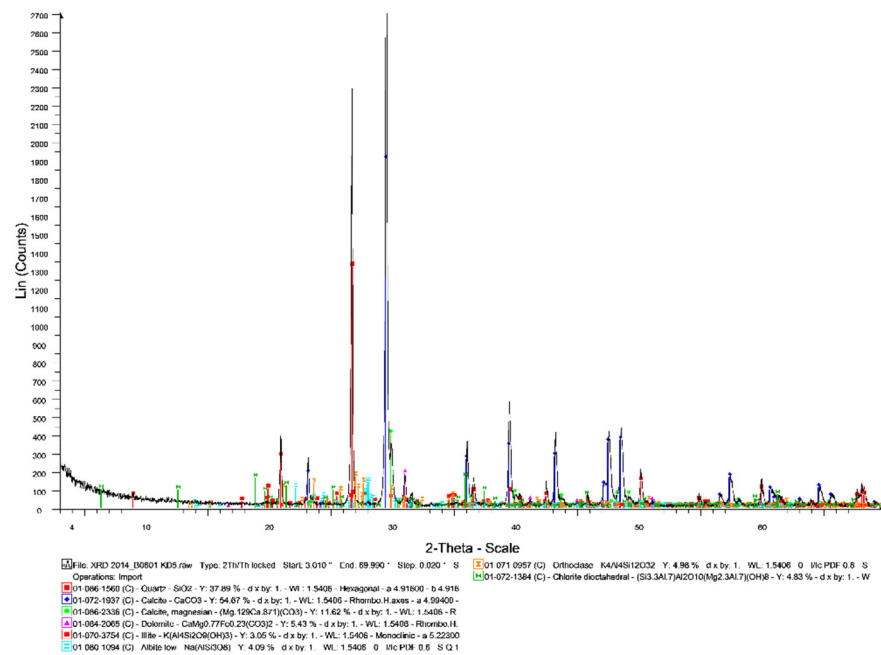

Figure S6. XRD analyses of beachrock sample from natural Diolkos beachrock Kodi5.

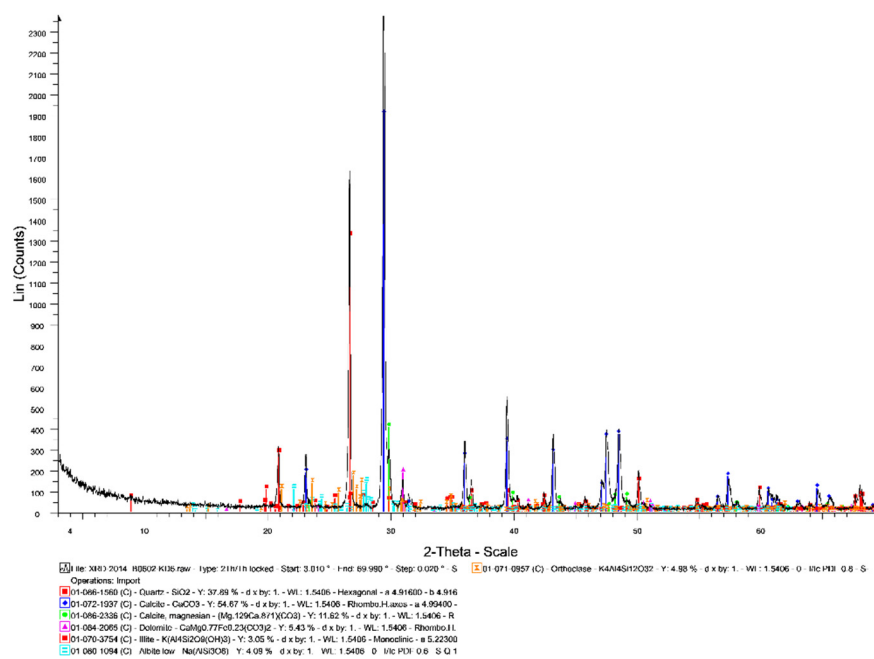

Figure S7. XRD analyses of beachrock sample from natural Diolkos beachrock Kodi6.
